# Supplementary material for: Drought reconstruction since 1796 CE based on tree-ring widths in the upper Heilongjiang (Amur) River basin in Northeast Asia and its linkage to Pacific Ocean climate variability
Source: Copernicus journal article supplement (doi:10.5194/cp-19-2079-2023), 2023-10-30
Supplement: Supplementary file 1 [file cp-19-2079-2023-supplement.pdf]

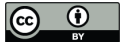

*Supplement of*

**Drought reconstruction since 1796 CE based on tree-ring widths  
in the upper Heilongjiang (Amur) River basin in Northeast  
Asia and its linkage to Pacific Ocean climate variability**

**Yang Xu et al.**

*Correspondence to:* Feng Chen (feng653@163.com)

The copyright of individual parts of the supplement might differ from the article licence.

Name of date set: Drought reconstruction since 1796 CE in the Upper Heilongjiang (Amur) River Basin

Original reference (tree-ring data):

year            Tree-ring index

|      |       |
|------|-------|
| 1796 | 1.405 |
| 1797 | 0.816 |
| 1798 | 1.267 |
| 1799 | 1.173 |
| 1800 | 0.829 |
| 1801 | 0.97  |
| 1802 | 1.087 |
| 1803 | 1.202 |
| 1804 | 1.257 |
| 1805 | 1.456 |
| 1806 | 0.844 |
| 1807 | 0.892 |
| 1808 | 0.904 |
| 1809 | 0.714 |
| 1810 | 1.031 |
| 1811 | 1.205 |
| 1812 | 0.65  |
| 1813 | 0.712 |
| 1814 | 0.88  |
| 1815 | 1.128 |
| 1816 | 0.973 |
| 1817 | 0.622 |
| 1818 | 0.67  |
| 1819 | 0.687 |
| 1820 | 1.379 |
| 1821 | 1.369 |
| 1822 | 0.77  |
| 1823 | 1.43  |
| 1824 | 0.937 |
| 1825 | 1.062 |
| 1826 | 0.463 |
| 1827 | 1.163 |
| 1828 | 0.937 |
| 1829 | 1.246 |
| 1830 | 1.307 |
| 1831 | 0.791 |
| 1832 | 0.822 |
| 1833 | 0.835 |
| 1834 | 0.877 |
| 1835 | 1.005 |
| 1836 | 0.995 |
| 1837 | 0.499 |
| 1838 | 0.964 |
| 1839 | 0.78  |
| 1840 | 0.461 |
| 1841 | 0.88  |
| 1842 | 0.415 |
| 1843 | 0.634 |
| 1844 | 0.979 |
| 1845 | 1.065 |

|      |       |
|------|-------|
| 1846 | 0.767 |
| 1847 | 1.038 |
| 1848 | 1.033 |
| 1849 | 0.911 |
| 1850 | 0.84  |
| 1851 | 0.731 |
| 1852 | 1.051 |
| 1853 | 0.895 |
| 1854 | 0.763 |
| 1855 | 0.642 |
| 1856 | 0.771 |
| 1857 | 0.507 |
| 1858 | 0.588 |
| 1859 | 0.924 |
| 1860 | 0.65  |
| 1861 | 0.681 |
| 1862 | 0.986 |
| 1863 | 0.762 |
| 1864 | 0.519 |
| 1865 | 0.697 |
| 1866 | 0.37  |
| 1867 | 0.607 |
| 1868 | 0.831 |
| 1869 | 1.065 |
| 1870 | 1.124 |
| 1871 | 0.958 |
| 1872 | 0.937 |
| 1873 | 0.672 |
| 1874 | 0.701 |
| 1875 | 1.106 |
| 1876 | 0.626 |
| 1877 | 0.721 |
| 1878 | 0.842 |
| 1879 | 0.854 |
| 1880 | 0.942 |
| 1881 | 1.358 |
| 1882 | 1.413 |
| 1883 | 1.097 |
| 1884 | 1.316 |
| 1885 | 1.581 |
| 1886 | 1.165 |
| 1887 | 1.483 |
| 1888 | 1.47  |
| 1889 | 1.424 |
| 1890 | 1.278 |
| 1891 | 0.978 |
| 1892 | 0.94  |
| 1893 | 1.121 |
| 1894 | 1.333 |
| 1895 | 1.158 |
| 1896 | 1.133 |
| 1897 | 1.128 |
| 1898 | 1.32  |
| 1899 | 1.177 |

|      |       |
|------|-------|
| 1900 | 1.097 |
| 1901 | 0.774 |
| 1902 | 0.871 |
| 1903 | 0.702 |
| 1904 | 0.819 |
| 1905 | 0.625 |
| 1906 | 0.971 |
| 1907 | 0.637 |
| 1908 | 0.977 |
| 1909 | 1.082 |
| 1910 | 1.228 |
| 1911 | 1.232 |
| 1912 | 0.862 |
| 1913 | 0.662 |
| 1914 | 1.225 |
| 1915 | 1.444 |
| 1916 | 1.148 |
| 1917 | 0.647 |
| 1918 | 1.188 |
| 1919 | 0.884 |
| 1920 | 0.895 |
| 1921 | 1.041 |
| 1922 | 1.241 |
| 1923 | 1.119 |
| 1924 | 0.955 |
| 1925 | 1.279 |
| 1926 | 0.722 |
| 1927 | 0.849 |
| 1928 | 1.042 |
| 1929 | 1.315 |
| 1930 | 1.228 |
| 1931 | 0.989 |
| 1932 | 1.425 |
| 1933 | 1.248 |
| 1934 | 1.285 |
| 1935 | 0.731 |
| 1936 | 0.758 |
| 1937 | 0.883 |
| 1938 | 0.91  |
| 1939 | 1.099 |
| 1940 | 1.067 |
| 1941 | 0.794 |
| 1942 | 0.634 |
| 1943 | 0.98  |
| 1944 | 0.568 |
| 1945 | 0.815 |
| 1946 | 1.006 |
| 1947 | 0.959 |
| 1948 | 1.055 |
| 1949 | 1.232 |
| 1950 | 0.79  |
| 1951 | 0.309 |
| 1952 | 1.088 |
| 1953 | 1.202 |

|      |       |
|------|-------|
| 1954 | 1.17  |
| 1955 | 1.396 |
| 1956 | 1.481 |
| 1957 | 1.773 |
| 1958 | 1.577 |
| 1959 | 1.351 |
| 1960 | 1.334 |
| 1961 | 0.718 |
| 1962 | 1.239 |
| 1963 | 0.863 |
| 1964 | 1.082 |
| 1965 | 0.699 |
| 1966 | 0.971 |
| 1967 | 0.823 |
| 1968 | 0.907 |
| 1969 | 0.891 |
| 1970 | 1.099 |
| 1971 | 0.982 |
| 1972 | 0.824 |
| 1973 | 1.357 |
| 1974 | 0.981 |
| 1975 | 1.247 |
| 1976 | 1.063 |
| 1977 | 1.188 |
| 1978 | 1.113 |
| 1979 | 0.831 |
| 1980 | 1.222 |
| 1981 | 1.213 |
| 1982 | 1.098 |
| 1983 | 1.074 |
| 1984 | 1.279 |
| 1985 | 1.252 |
| 1986 | 0.879 |
| 1987 | 0.572 |
| 1988 | 0.937 |
| 1989 | 1.302 |
| 1990 | 1.256 |
| 1991 | 1.128 |
| 1992 | 0.714 |
| 1993 | 0.928 |
| 1994 | 0.72  |
| 1995 | 0.775 |
| 1996 | 0.522 |
| 1997 | 0.639 |
| 1998 | 0.933 |
| 1999 | 0.958 |
| 2000 | 0.759 |
| 2001 | 0.618 |
| 2002 | 0.883 |
| 2003 | 0.779 |
| 2004 | 0.86  |
| 2005 | 0.878 |
| 2006 | 0.847 |
| 2007 | 0.532 |

|      |       |
|------|-------|
| 2008 | 0.79  |
| 2009 | 0.648 |
| 2010 | 0.75  |
| 2011 | 0.576 |
| 2012 | 0.936 |
| 2013 | 1.189 |
| 2014 | 1.496 |
| 2015 | 1.547 |
| 2016 | 0.933 |
| 2017 | 0.696 |
| 2018 | 1.244 |
| 2019 | 0.703 |
| 2020 | 0.917 |
